# Supplementary material for: Oxygen vacancy-rich doped CDs@graphite felt-600 heterostructures for high-performance supercapacitor electrodes
Source: Royal Society of Chemistry journal article supplement (doi:10.1039/d0nr08251a), 2021-01-01
Supplement: d0nr08251a1.pdf [file d0nr08251a1.pdf]

## Oxygen Vacancy-Rich doped CDs@graphite felt-600 Heterostructures for High-performance Supercapacitor Electrodes

Yashi Chen <sup>a,b</sup>, Danlian Huang <sup>a,b,\*</sup>, Lei Lei <sup>a,b</sup>, Sha Chen <sup>a,b</sup>, Xigui Liu <sup>a,b</sup>, Min Cheng <sup>a,b</sup>

<sup>a</sup> *College of Environmental Science and Engineering, Hunan University, Changsha, Hunan 410082, China*

<sup>b</sup> *Key Laboratory of Environmental Biology and Pollution Control (Hunan University), Ministry of Education, Changsha, Hunan 410082, China*

### S1 Density functional theory calculation

---

\* Corresponding author at: College of Environmental Science and Engineering, Hunan University, Changsha, Hunan 410082, China.

Tel.: +86-731-88822754; fax: +86-731-88823701.

E-mail address: huangdanlian@hnu.edu.cn (D.L. Huang).

First-principle calculations were conducted by density functional theory (DFT). And the general gradient approximation in the Perdew–Burke–Ernzerhof was used to display the exchange–correlation energy. The planewaves cutoff energy of 400 eV was used. The tolerance for structural optimization was reached at  $0.05 \text{ eV}\text{\AA}^{-1}$ . To calculate the binding energies, CDs on GF (9 \*9\*1 periodic supercell) in two different possible orientations named vertical and parallel were discussed. The translation vector along the z direction was defined as 25 Å.

Table S1 Density of different electrode materials.

| electrode materials   | $\rho$ (g cm <sup>-3</sup> ) | $C_1$ (F cm <sup>-2</sup> ) |
|-----------------------|------------------------------|-----------------------------|
| graphite felt         | 0.149                        | 0.018                       |
| GA@graphite felt      | 0.175                        | 0.003                       |
| CDs@graphite felt-500 | 0.157                        | 0.051                       |
| CDs@graphite felt-600 | 0.171                        | 3.34                        |
| CDs@graphite felt-700 | 0.231                        | 2.5                         |

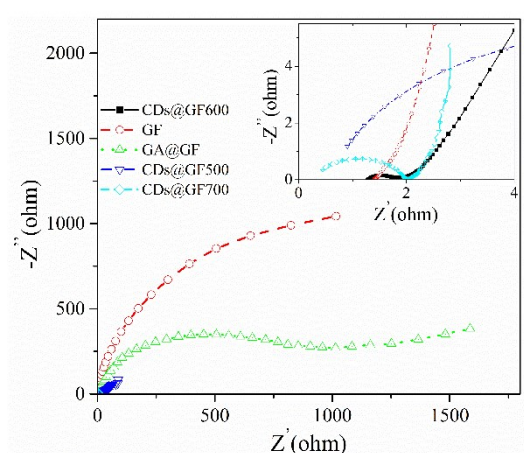

Fig. S1 the corresponding magnification of the high-frequency region of the Fig.6b.

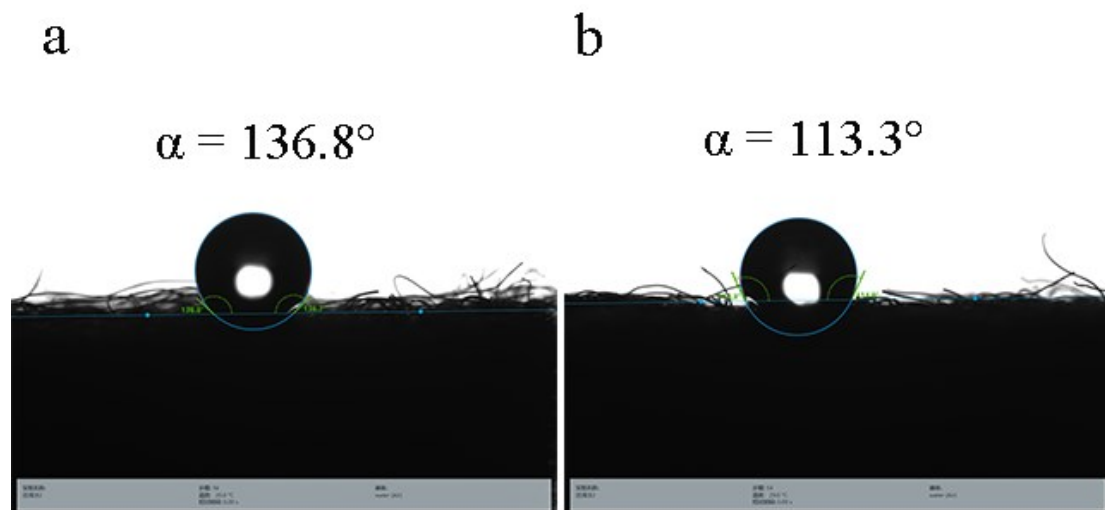

Fig. S2 The contact angle measurements of GF (a) and CDs@GF600 (b).

Table S2 The detailed parameters of the equivalent circuit

| electrode                                         | $R_s$ ( $\Omega$ ) | $R_{ct}$ ( $\Omega$ ) | $Z_w$ ( $\Omega$ ) |
|---------------------------------------------------|--------------------|-----------------------|--------------------|
| graphite felt                                     | 1.47               | 2600                  | 0.91               |
| GA@graphite felt                                  | 3.67               | 989.6                 | 0.82               |
| CDs@graphite felt-500                             | 0.68               | 12.7                  | 0.93               |
| CDs@graphite felt-700                             | 0.30               | 1.67                  | 0.91               |
| CDs@graphite felt-600                             | 1.18               | 0.73                  | 0.48               |
| CDs@graphite felt-600 SC Cycle 1 <sup>st</sup>    | 11.03              | 14.66                 | 0.22               |
| CDs@graphite felt-600 SC Cycle 7000 <sup>th</sup> | 6.85               | 18.42                 | 0.22               |

$R_s$ -the equivalent series resistance, which is the high frequency intercept of the semicircle on the real axis;  $R_{ct}$ -charge-transfer resistance, which is the diameter of the semicircle.  $Z_w$ -the Warburg resistance.
